# Supplementary material
Source: PubMed Central journal article supplement (PMC7380165)
Supplement: NIHPP2020.03.23.20038331-supplement-1.pdf [file NIHPP2020.03.23.20038331-supplement-1.pdf]

## Supporting Information

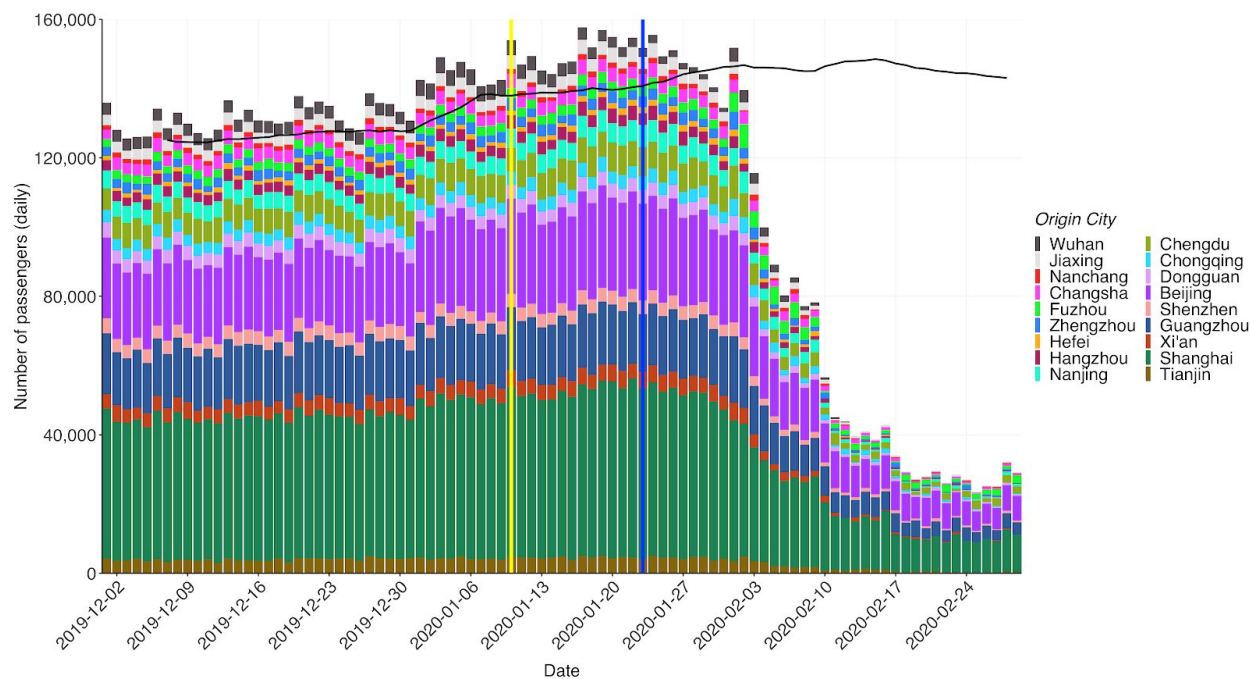

**Supplementary Figure S1.** Estimated daily flight volume from 18 Chinese cities to 43 international destinations (10 high-surveillance destinations for model validation, 26 African destinations, 7 additional destinations) from 1st December 2019 to 29th February 2020. The yellow vertical line marks the start of the 40-day Chunyun period surrounding Lunar New Year. The blue vertical line indicates 23rd January 2020, the day travel restrictions were widely implemented in Wuhan. The black line shows the 7-day rolling average of the estimated daily flight volume from 18 Chinese cities to 43 international destinations for the equivalent period one year earlier: from 1st December 2018 to 28th February 2019.

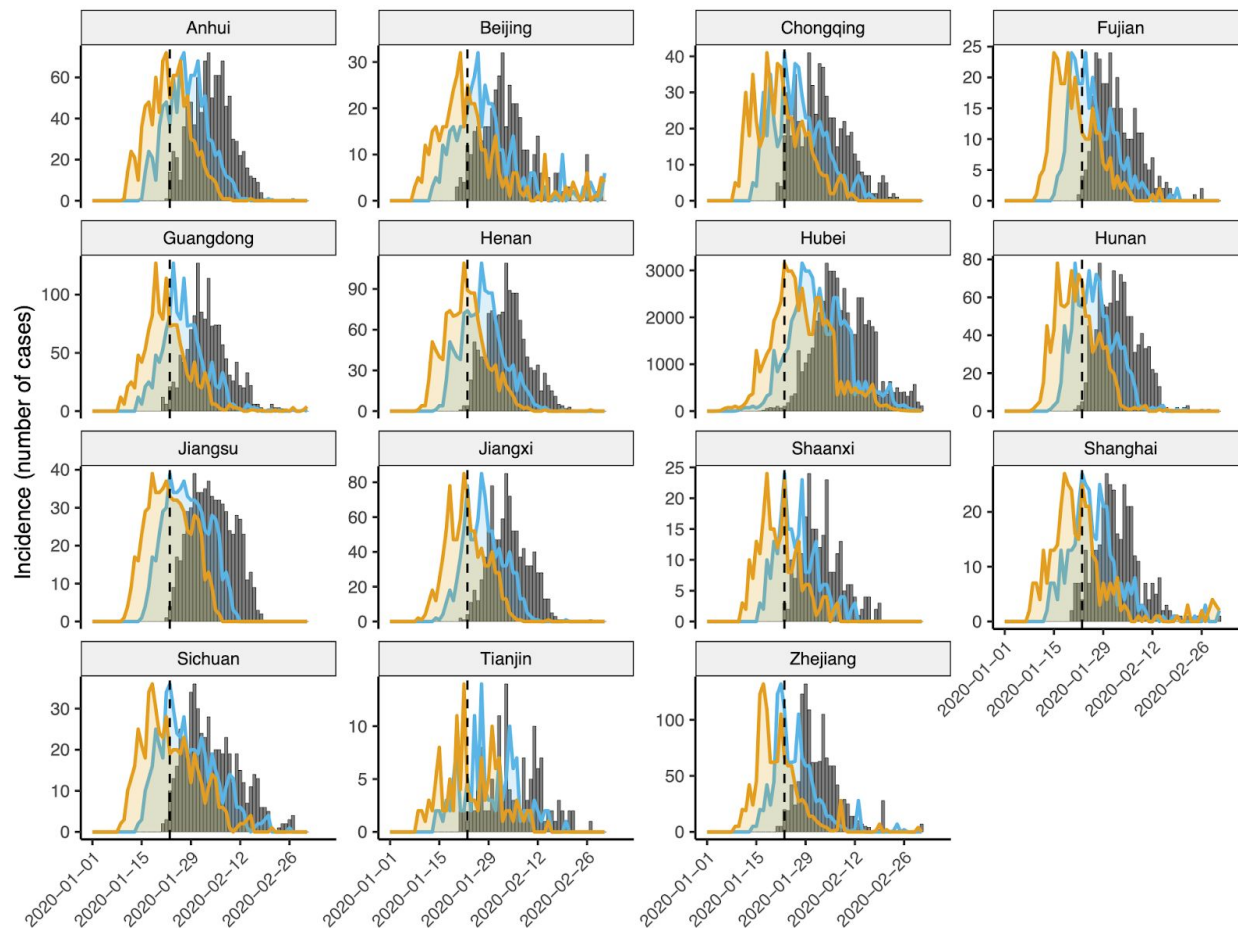

**Supplementary Figure S2.** Back-calculation of symptom onsets (blue) and infections (orange) from observed confirmed case counts (grey bars) for all provinces considered here. Confirmed cases were shifted back by 7 days (the mean confirmation delay) to estimate symptom onset incidence, then further by 5 days (the median incubation period) to estimate infection incidence of those cases. Vertical dashed line shows 23rd January 2020, the date of lockdown in Wuhan.

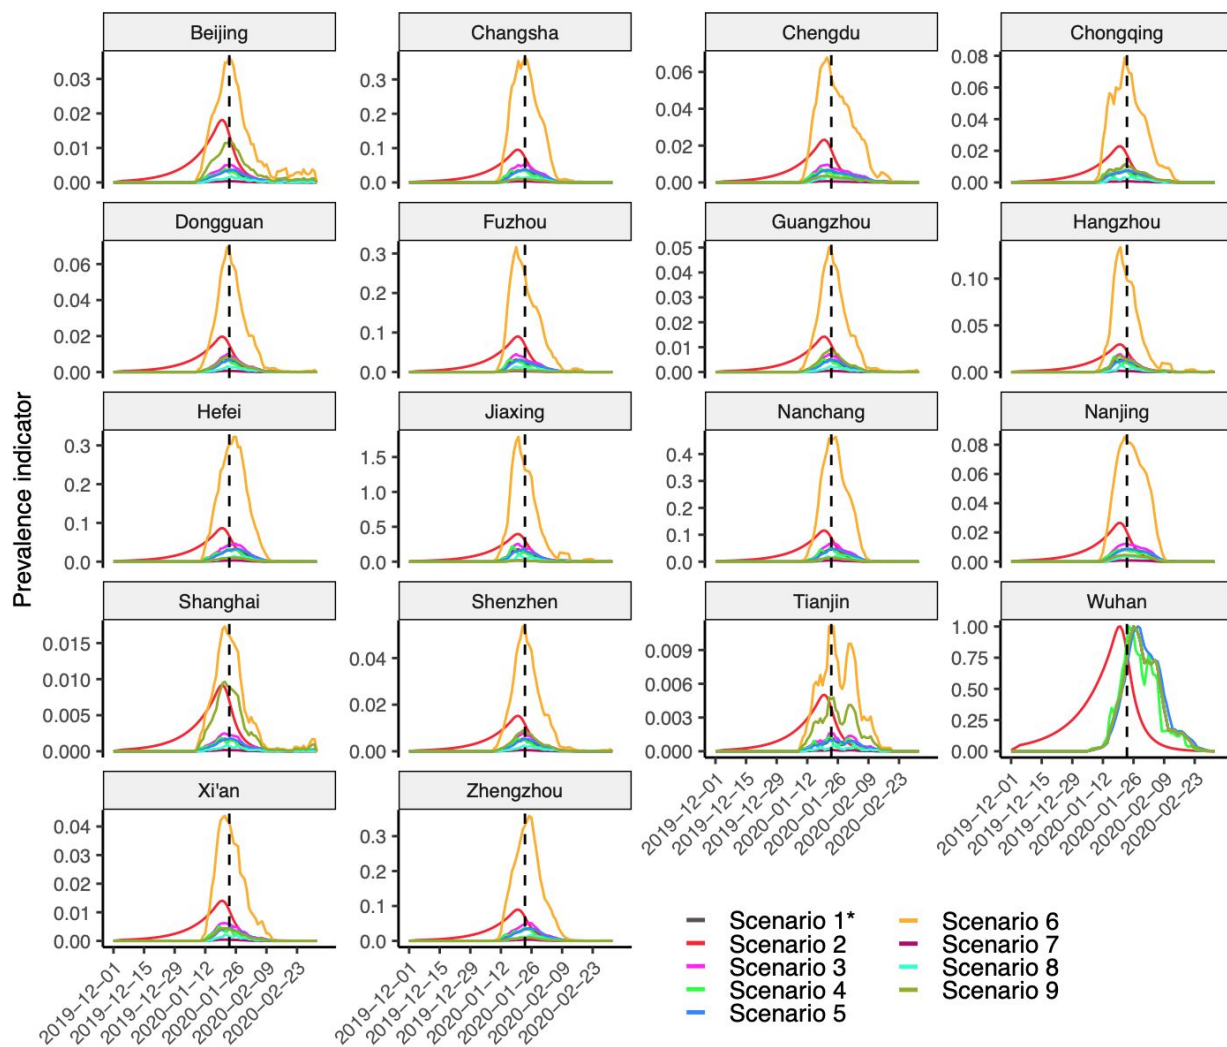

**Supplementary Figure S3.** Prevalence indicator in the 18 considered Chinese cities. Values were scaled relative to the maximum prevalence indicator in Wuhan within each scenario. Note that Scenarios 1, 3 and 6-9 yield identical curves in Wuhan. Note also that Scenario 2 is based on independent estimates as described in the main text Methods. Vertical dashed line shows 23rd January 2020, the date of lockdown in Wuhan.

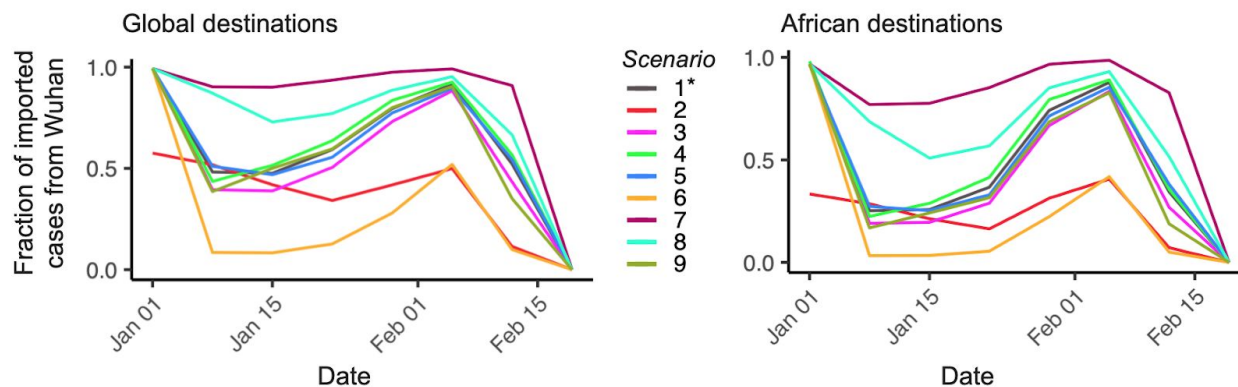

**Supplementary Figure S4.** Weekly fraction of imported cases from Wuhan to global destinations (left-hand side) and to African destinations (right-hand side) shows as mean predictions for each of the 9 scenarios. The best-estimate scenario is Scenario 1 (highlighted with an asterisk). The x-axis shows the date for the current year 2020.

| Country           | 1*          | 2          | 3           | 4           | 5           | 6          | 7           | 8           | 9           |
|-------------------|-------------|------------|-------------|-------------|-------------|------------|-------------|-------------|-------------|
| Algeria           | 1.56        | 0.21       | 1.59        | 1.15        | 1.92        | 2.18       | 1.50        | 1.52        | 1.68        |
| Angola            | 0.13        | 0.07       | 0.14        | 0.11        | 0.15        | 0.45       | 0.10        | 0.11        | 0.18        |
| DRC               | 0.10        | 0.07       | 0.15        | 0.07        | 0.12        | 1.02       | 0.01        | 0.04        | 0.19        |
| Côte D'Ivoire     | 0.10        | 0.07       | 0.13        | 0.08        | 0.12        | 0.74       | 0.04        | 0.06        | 0.19        |
| Egypt             | 3.89        | 2.45       | 5.29        | 3.02        | 4.54        | 33.23      | 0.95        | 1.91        | 3.29        |
| Equatorial Guinea | 0.04        | 0.02       | 0.04        | 0.03        | 0.04        | 0.19       | 0.02        | 0.03        | 0.08        |
| Ethiopia          | 0.63        | 0.40       | 0.84        | 0.47        | 0.76        | 5.15       | 0.18        | 0.33        | 1.24        |
| Gabon             | 0.06        | 0.04       | 0.08        | 0.05        | 0.07        | 0.36       | 0.03        | 0.04        | 0.12        |
| Ghana             | 0.24        | 0.15       | 0.30        | 0.19        | 0.28        | 1.57       | 0.11        | 0.15        | 0.41        |
| Guinea            | 0.06        | 0.06       | 0.08        | 0.04        | 0.07        | 0.59       | 0.01        | 0.02        | 0.16        |
| Kenya             | 1.95        | 0.84       | 2.30        | 1.53        | 2.28        | 9.21       | 1.22        | 1.46        | 1.79        |
| Madagascar        | 0.07        | 0.05       | 0.10        | 0.06        | 0.08        | 0.58       | 0.02        | 0.04        | 0.13        |
| Mauritania        | 0.04        | 0.02       | 0.04        | 0.03        | 0.05        | 0.20       | 0.02        | 0.03        | 0.06        |
| Mauritius         | 0.28        | 0.20       | 0.37        | 0.21        | 0.32        | 2.34       | 0.07        | 0.14        | 0.62        |
| Morocco           | 1.52        | 0.77       | 1.80        | 1.21        | 1.75        | 7.38       | 0.93        | 1.12        | 1.82        |
| Mozambique        | 0.14        | 0.06       | 0.15        | 0.10        | 0.17        | 0.52       | 0.10        | 0.11        | 0.17        |
| Nigeria           | 0.38        | 0.26       | 0.51        | 0.29        | 0.45        | 3.07       | 0.11        | 0.20        | 0.68        |
| Senegal           | 0.07        | 0.05       | 0.09        | 0.05        | 0.08        | 0.52       | 0.02        | 0.04        | 0.16        |
| Seychelles        | 0.18        | 0.08       | 0.21        | 0.15        | 0.21        | 0.63       | 0.14        | 0.15        | 0.23        |
| South Africa      | 4.51        | 1.72       | 5.17        | 3.47        | 5.37        | 18.34      | 3.13        | 3.60        | 4.41        |
| Sudan             | 0.24        | 0.16       | 0.35        | 0.19        | 0.28        | 2.42       | 0.02        | 0.09        | 0.25        |
| Tanzania          | 0.31        | 0.20       | 0.40        | 0.24        | 0.36        | 2.39       | 0.10        | 0.17        | 0.46        |
| Tunisia           | 0.17        | 0.10       | 0.22        | 0.13        | 0.21        | 1.25       | 0.07        | 0.10        | 0.19        |
| Uganda            | 0.20        | 0.13       | 0.27        | 0.15        | 0.24        | 1.60       | 0.06        | 0.11        | 0.35        |
| Zambia            | 1.42        | 0.25       | 1.52        | 1.03        | 1.75        | 3.64       | 1.19        | 1.27        | 1.58        |
| Zimbabwe          | 0.14        | 0.09       | 0.18        | 0.12        | 0.16        | 0.83       | 0.07        | 0.10        | 0.19        |
| <b>Total</b>      | <b>18.4</b> | <b>8.5</b> | <b>22.3</b> | <b>14.2</b> | <b>21.8</b> | <b>100</b> | <b>10.2</b> | <b>12.9</b> | <b>20.6</b> |

**Supplementary Table S1.** Table of mean imported cases to 26 African destination locations, by scenario, with our best-guess scenarios marked by a \*. Countries ordered alphabetically.
